# Supplementary material for: Dysfunction in IGF2R Pathway and Associated Perturbations in Autophagy and WNT Processes in Beckwith–Wiedemann Syndrome Cell Lines
Source: MDPI journal article supplement (doi:10.3390/ijms25073586), 2024-03-22
Supplement: s1 [file s1]

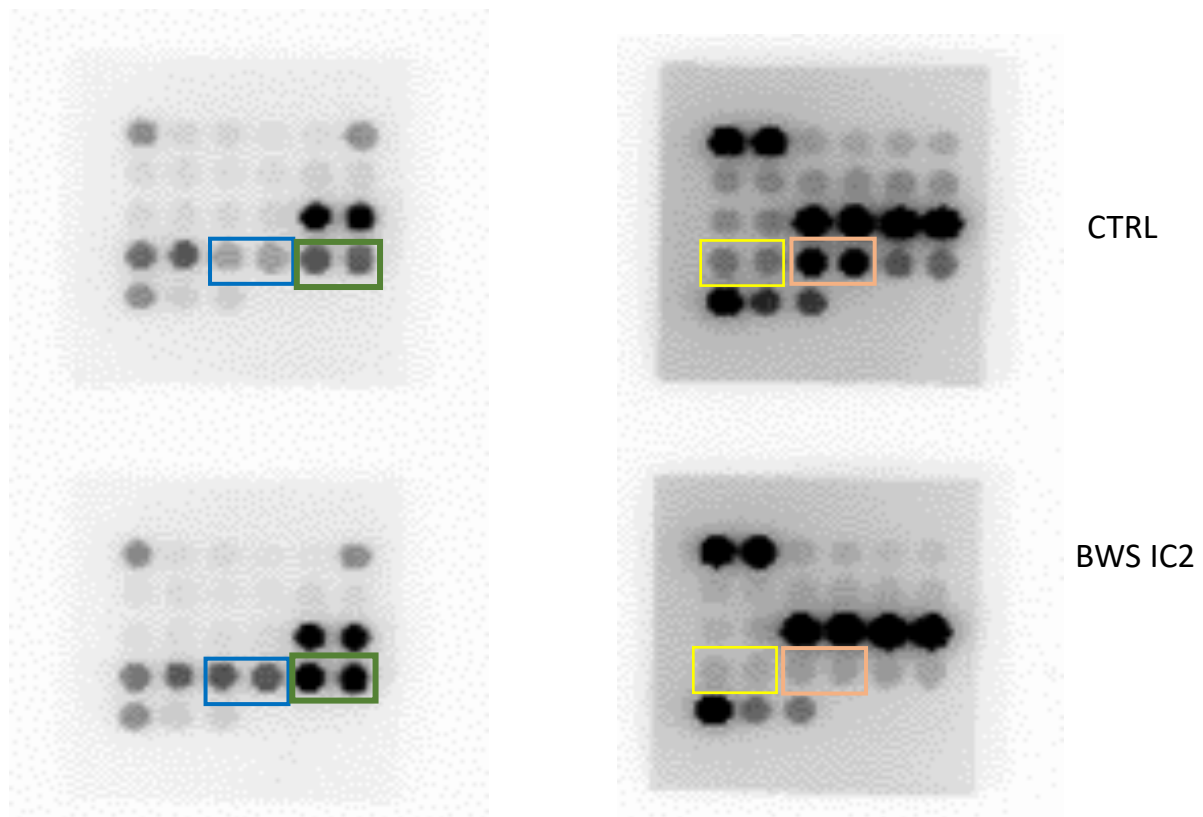

**Supplemental Figure S1.** Analysis of the phosphorylation pattern of components of the PI3K and MAPK pathways by PathScan EGFR signaling antibody array Kit in BWS IC2 and CTRL LCLs. Phosphorylation of MEK1/2 (Ser221) and MEK1/2 (Ser217/221) are highlighted in blue and green, respectively. Phosphorylation of Akt (Thr308) and Akt (Ser473) are highlighted in yellow and orange, respectively.

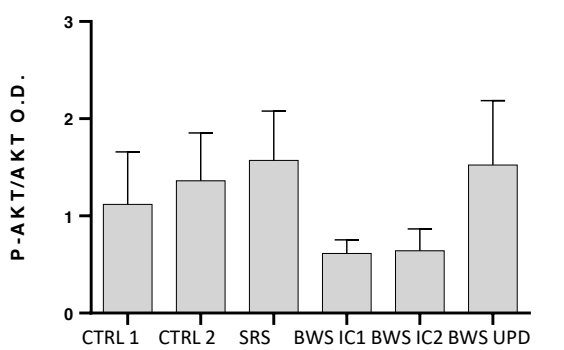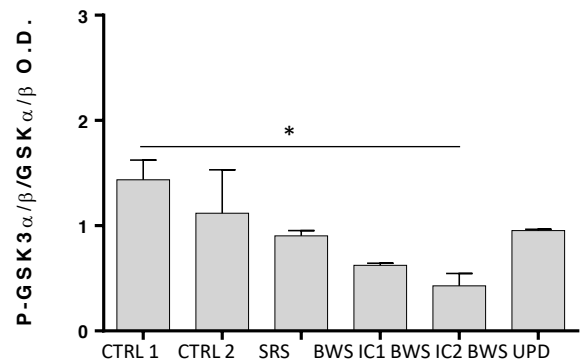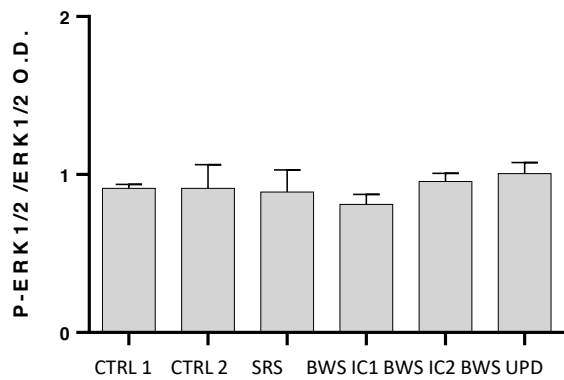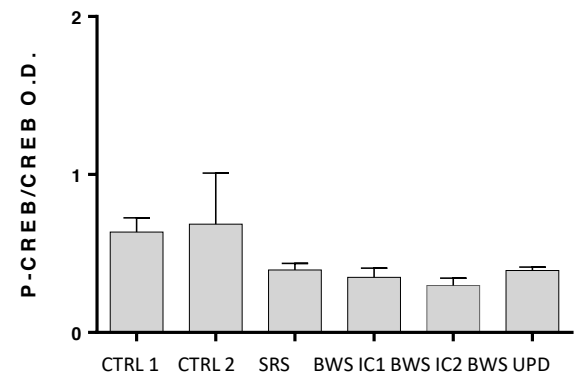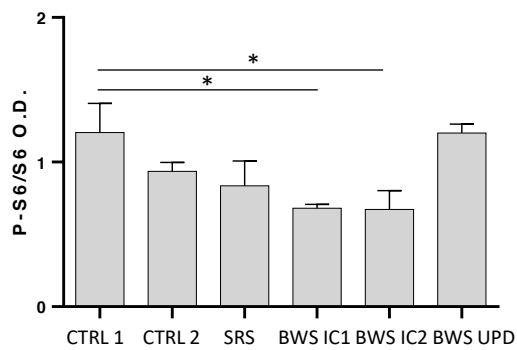

**Supplemental Figure S2.** Relative intensity (Optical density: O.D.) by densitometric analysis was evaluated and expressed as ratio of phospho/total proteins. Data represent the mean  $\pm$  SEM of 3 experiments (two way-ANOVA,  $* < 0.05$ )

Table S1. Panel of genes of the WNT pathway analyzed by nCounter approach

| GENE          | Accession      | Log2 fold change | P-value  | BH.p.value | Pathway annotation                                                                   |
|---------------|----------------|------------------|----------|------------|--------------------------------------------------------------------------------------|
| <i>TP53</i>   | NM_000546.2    | 0.632            | 2.81e-05 | 0.00446    | KEGG WNT Annotation                                                                  |
| <i>PLAUR</i>  | NM_001005376.1 | -2.16            | 0.000288 | 0.0229     | Proteolysis                                                                          |
| <i>CUL1</i>   | NM_003592.2    | 0.196            | 0.000798 | 0.0377     | KEGG WNT Annotation                                                                  |
| <i>PRKCB</i>  | NM_212535.1    | -1.23            | 0.00102  | 0.0377     | KEGG WNT Annotation                                                                  |
| <i>FRAT1</i>  | NM_005479.3    | 1.83             | 0.00146  | 0.0377     | Canonical Wnt Pathway, KEGG WNT Annotation                                           |
| <i>AXIN1</i>  | NM_181050.1    | 0.265            | 0.00149  | 0.0377     | Canonical Wnt Pathway, KEGG WNT Annotation, WNT Signaling Negative Regulation        |
| <i>MAPK9</i>  | NM_139068.2    | 0.51             | 0.00166  | 0.0377     | KEGG WNT Annotation                                                                  |
| <i>CEBPD</i>  | NM_005195.3    | 1.58             | 0.0027   | 0.0481     | Transcription Factors                                                                |
| <i>DKK4</i>   | NM_014420.2    | -1.2             | 0.00272  | 0.0481     | KEGG WNT Annotation                                                                  |
| <i>MAPK10</i> | NM_002753.2    | -6.57            | 0.00526  | 0.079      | KEGG WNT Annotation                                                                  |
| <i>CREBBP</i> | NM_001079846.1 | 0.547            | 0.00573  | 0.079      | KEGG WNT Annotation                                                                  |
| <i>PITX2</i>  | NM_000325.5    | 3.94             | 0.00649  | 0.079      | Transcription Factors, WNT Signaling Target Genes                                    |
| <i>RBX1</i>   | NM_014248.2    | -0.521           | 0.00682  | 0.079      | KEGG WNT Annotation                                                                  |
| <i>MMP9</i>   | NM_004994.2    | 2.09             | 0.00722  | 0.079      | Calcium Binding and Signaling, Development & Differentiation, Migration, Proteolysis |
| <i>FBXW11</i> | NM_033645.2    | 0.313            | 0.00745  | 0.079      | KEGG WNT Annotation, WNT Signaling Negative Regulation                               |
| <i>WNT10A</i> | NM_025216.2    | -2.25            | 0.00837  | 0.0832     | Calcium Binding and Signaling, Canonical Wnt Pathway, KEGG WNT Annotation            |
| <i>GSK3A</i>  | NM_019884.2    | 0.167            | 0.0168   | 0.157      | Canonical Wnt Pathway                                                                |

|                |                |        |        |       |                                                                                                                                                              |
|----------------|----------------|--------|--------|-------|--------------------------------------------------------------------------------------------------------------------------------------------------------------|
| <i>GDNF</i>    | NM_000514.2    | -4.12  | 0.0222 | 0.185 | Development & Differentiation, Migration                                                                                                                     |
| <i>SMAD2</i>   | NM_005901.5    | 0.278  | 0.0268 | 0.206 | EMTMetastasis, KEGG WNT Annotation                                                                                                                           |
| <i>SMAD4</i>   | NM_005359.3    | 0.374  | 0.0272 | 0.206 | KEGG WNT Annotation                                                                                                                                          |
| <i>ERBB2</i>   | NM_001005862.1 | -0.679 | 0.0319 | 0.222 | EMTMetastasis                                                                                                                                                |
| <i>PKN1</i>    | NM_213560.1    | 0.357  | 0.0322 | 0.222 | EMTMetastasis                                                                                                                                                |
| <i>PTGS2</i>   | NM_000963.1    | -2.07  | 0.0335 | 0.222 | Calcium Binding and Signaling, Cell Cycle                                                                                                                    |
| <i>CXCL12</i>  | NM_000609.5    | -3.36  | 0.0367 | 0.226 | EMTMetastasis                                                                                                                                                |
| <i>BMP4</i>    | NM_001202.3    | 0.757  | 0.0372 | 0.226 | Development & Differentiation                                                                                                                                |
| <i>T</i>       | NM_003181.2    | 4.22   | 0.0383 | 0.226 | Development & Differentiation, Transcription Factors                                                                                                         |
| <i>BAMBI</i>   | NM_012342.2    | 3.2    | 0.0408 | 0.226 | Canonical Wnt Pathway                                                                                                                                        |
| <i>CCND1</i>   | NM_053056.2    | -2.39  | 0.0425 | 0.226 | Calcium Binding and Signaling, Cell Cycle, Development & Differentiation, KEGG WNT Annotation, WNT Signaling Negative Regulation, WNT Signaling Target Genes |
| <i>FZD2</i>    | NM_001466.2    | -2.36  | 0.0426 | 0.226 | Calcium Binding and Signaling, Canonical Wnt Pathway, KEGG WNT Annotation                                                                                    |
| <i>PRKACA</i>  | NM_002730.3    | -0.319 | 0.0519 | 0.252 | KEGG WNT Annotation                                                                                                                                          |
| <i>FOXN1</i>   | NM_003593.2    | -3.47  | 0.055  | 0.252 | Development & Differentiation                                                                                                                                |
| <i>TCF7L1</i>  | NM_031283.1    | -1.11  | 0.0575 | 0.252 | Canonical Wnt Pathway, KEGG WNT Annotation, Transcription Factors                                                                                            |
| <i>TBL1XR1</i> | NM_024665.4    | 0.332  | 0.061  | 0.252 | KEGG WNT Annotation                                                                                                                                          |
| <i>ETS2</i>    | NM_005239.4    | 0.771  | 0.0618 | 0.252 | Transcription Factors                                                                                                                                        |
| <i>WNT10B</i>  | NM_003394.2    | -1.67  | 0.0627 | 0.252 | KEGG WNT Annotation                                                                                                                                          |
| <i>MYC</i>     | NM_002467.3    | 0.568  | 0.0639 | 0.252 | Cell Cycle, KEGG WNT Annotation, Transcription Factors, WNT Signaling Target Genes                                                                           |

|                 |                |        |        |       |                                                                               |
|-----------------|----------------|--------|--------|-------|-------------------------------------------------------------------------------|
| <i>WNT2</i>     | NM_003391.2    | -1.47  | 0.0647 | 0.252 | Calcium Binding and Signaling, Canonical Wnt Pathway, KEGG WNT Annotation     |
| <i>FZD1</i>     | NM_003505.1    | 1.58   | 0.0668 | 0.252 | Canonical Wnt Pathway, KEGG WNT Annotation                                    |
| <i>ZEB1</i>     | NM_001128128.1 | 0.351  | 0.0673 | 0.252 | EMTMetastasis                                                                 |
| <i>SOX2</i>     | NM_003106.2    | -2.25  | 0.0691 | 0.252 | Cell Cycle, Development & Differentiation, Transcription Factors              |
| <i>POU5F1</i>   | NM_002701.4    | -0.589 | 0.0704 | 0.252 | Development & Differentiation, Transcription Factors                          |
| <i>FN1</i>      | NM_212482.1    | -2.03  | 0.0706 | 0.252 | Development & Differentiation, Migration                                      |
| <i>FZD3</i>     | NM_017412.2    | -1.04  | 0.0713 | 0.252 | Canonical Wnt Pathway, KEGG WNT Annotation                                    |
| <i>FZD8</i>     | NM_031866.1    | -3.06  | 0.0742 | 0.256 | Canonical Wnt Pathway, KEGG WNT Annotation                                    |
| <i>TIMP1</i>    | NM_003254.2    | -1.19  | 0.0766 | 0.259 | EMTMetastasis                                                                 |
| <i>SERPINE1</i> | NM_001165413.1 | -2.58  | 0.0809 | 0.268 | EMTMetastasis                                                                 |
| <i>PDGFRA</i>   | NM_006206.3    | -1.69  | 0.0855 | 0.278 | Development & Differentiation, Migration                                      |
| <i>APC</i>      | NM_000038.3    | 0.293  | 0.0896 | 0.28  | Canonical Wnt Pathway, KEGG WNT Annotation, WNT Signaling Negative Regulation |
| <i>RUVBL1</i>   | NM_003707.2    | -0.333 | 0.0908 | 0.28  | Canonical Wnt Pathway, KEGG WNT Annotation                                    |
| <i>RUNX2</i>    | NM_004348.3    | -0.691 | 0.0945 | 0.284 | Development & Differentiation, Transcription Factors                          |
| <i>TCF4</i>     | NM_003199.1    | 0.362  | 0.105  | 0.309 | Transcription Factors                                                         |
| <i>LEF1</i>     | NM_016269.3    | 1.58   | 0.11   | 0.316 | Canonical Wnt Pathway, KEGG WNT Annotation, Transcription Factors             |
| <i>CSNK1A1</i>  | NM_001892.4    | 0.219  | 0.111  | 0.316 | Canonical Wnt Pathway, KEGG WNT Annotation                                    |
| <i>SOX9</i>     | NM_000346.2    | 0.811  | 0.119  | 0.326 | Adhesion, Development & Differentiation, Transcription Factors                |
| <i>DVL1</i>     | NM_004421.2    | 0.306  | 0.127  | 0.339 | Canonical Wnt Pathway, KEGG WNT Annotation, Planar Cell Polarity (PCP)        |
| <i>SMAD3</i>    | NM_005902.3    | 0.887  | 0.132  | 0.34  | KEGG WNT Annotation                                                           |

|                |                |        |       |       |                                                                                                           |
|----------------|----------------|--------|-------|-------|-----------------------------------------------------------------------------------------------------------|
| <i>NRP1</i>    | NM_003873.5    | -4.33  | 0.134 | 0.34  | Development & Differentiation, Migration                                                                  |
| <i>PORCN</i>   | NM_022825.2    | 0.22   | 0.135 | 0.34  | Canonical Wnt Pathway, KEGG WNT Annotation                                                                |
| <i>DVL2</i>    | NM_004422.2    | 0.229  | 0.137 | 0.34  | Canonical Wnt Pathway, KEGG WNT Annotation, Planar Cell Polarity (PCP)                                    |
| <i>AXIN2</i>   | NM_004655.3    | 2      | 0.14  | 0.343 | Canonical Wnt Pathway, KEGG WNT Annotation, WNT Signaling Negative Regulation, WNT Signaling Target Genes |
| <i>PRKACB</i>  | NM_182948.2    | 0.836  | 0.143 | 0.345 | KEGG WNT Annotation                                                                                       |
| <i>SNAI2</i>   | NM_003068.3    | -2.53  | 0.145 | 0.345 | EMTMetastasis                                                                                             |
| <i>PPP3CB</i>  | NM_001142354.1 | -0.129 | 0.15  | 0.351 | KEGG WNT Annotation                                                                                       |
| <i>KREMEN1</i> | NM_001039570.1 | -1.67  | 0.157 | 0.351 | WNT Signaling Negative Regulation                                                                         |
| <i>SFRP1</i>   | NM_003012.3    | -1.58  | 0.159 | 0.351 | Canonical Wnt Pathway, KEGG WNT Annotation, WNT Signaling Negative Regulation                             |
| <i>CTNNB1</i>  | NM_001098210.1 | 0.221  | 0.159 | 0.351 | Canonical Wnt Pathway, KEGG WNT Annotation                                                                |
| <i>DAB2</i>    | NM_001343.2    | -2.05  | 0.16  | 0.351 | Development & Differentiation, WNT Signaling Target Genes                                                 |
| <i>WNT11</i>   | NM_004626.2    | 2.15   | 0.163 | 0.351 | Calcium Binding and Signaling, KEGG WNT Annotation                                                        |
| <i>NLK</i>     | NM_016231.2    | 0.267  | 0.164 | 0.351 | KEGG WNT Annotation, WNT Signaling Negative Regulation                                                    |
| <i>RAC1</i>    | NM_198829.1    | 0.213  | 0.168 | 0.351 | KEGG WNT Annotation                                                                                       |
| <i>CDKN2A</i>  | NM_000077.3    | 0.552  | 0.168 | 0.351 | Cell Cycle, Development & Differentiation, Transcription Factors                                          |
| <i>CXXC4</i>   | NM_025212.1    | -0.783 | 0.172 | 0.355 | Canonical Wnt Pathway, KEGG WNT Annotation, WNT Signaling Negative Regulation                             |
| <i>KLF5</i>    | NM_001730.3    | 1.01   | 0.195 | 0.392 | Transcription Factors                                                                                     |
| <i>PRKCG</i>   | NM_002739.3    | -0.992 | 0.198 | 0.394 | KEGG WNT Annotation                                                                                       |
| <i>NANOG</i>   | NM_024865.2    | -0.367 | 0.206 | 0.404 | Development & Differentiation, Transcription Factors                                                      |
| <i>IRS1</i>    | NM_005544.2    | 0.815  | 0.212 | 0.41  | Migration                                                                                                 |

|               |                |        |       |       |                                                                                                                  |
|---------------|----------------|--------|-------|-------|------------------------------------------------------------------------------------------------------------------|
| <i>SKP1</i>   | NM_170679.2    | -0.09  | 0.217 | 0.413 | KEGG WNT Annotation                                                                                              |
| <i>PPP3CA</i> | NM_000944.4    | 0.758  | 0.218 | 0.413 | KEGG WNT Annotation                                                                                              |
| <i>RAC3</i>   | NM_005052.2    | 0.337  | 0.221 | 0.413 | KEGG WNT Annotation                                                                                              |
| <i>WNT4</i>   | NM_030761.3    | -1.03  | 0.224 | 0.414 | Calcium Binding and Signaling, Canonical Wnt Pathway, KEGG WNT Annotation                                        |
| <i>JUN</i>    | NM_002228.3    | 0.501  | 0.233 | 0.421 | KEGG WNT Annotation, WNT Signaling Target Genes                                                                  |
| <i>TGFB3</i>  | NM_003239.2    | 0.398  | 0.254 | 0.455 | Development & Differentiation                                                                                    |
| <i>CCND3</i>  | NM_001760.2    | 0.342  | 0.279 | 0.493 | KEGG WNT Annotation                                                                                              |
| <i>MMP7</i>   | NM_002423.3    | -1.71  | 0.293 | 0.502 | Calcium Binding and Signaling, KEGG WNT Annotation, Proteolysis, WNT Signaling Target Genes                      |
| <i>SIX1</i>   | NM_005982.3    | -1.61  | 0.294 | 0.502 | Development & Differentiation, Migration, Transcription Factors                                                  |
| <i>PPARD</i>  | NM_006238.3    | -0.146 | 0.299 | 0.506 | Development & Differentiation, KEGG WNT Annotation, Migration, Transcription Factors, WNT Signaling Target Genes |
| <i>FZD6</i>   | NM_003506.2    | 0.818  | 0.315 | 0.527 | Canonical Wnt Pathway, KEGG WNT Annotation                                                                       |
| <i>IL6</i>    | NM_000600.1    | -1.1   | 0.328 | 0.543 | Development & Differentiation, Migration                                                                         |
| <i>VEGFA</i>  | NM_001025366.1 | 0.954  | 0.355 | 0.578 | Development & Differentiation, Migration                                                                         |
| <i>AES</i>    | NM_001130.5    | 0.126  | 0.357 | 0.578 | Canonical Wnt Pathway                                                                                            |
| <i>WNT5A</i>  | NM_003392.3    | -1     | 0.368 | 0.586 | Calcium Binding and Signaling, KEGG WNT Annotation                                                               |
| <i>WNT6</i>   | NM_006522.3    | 1.23   | 0.368 | 0.586 | Calcium Binding and Signaling, Canonical Wnt Pathway, KEGG WNT Annotation                                        |
| <i>BIRC5</i>  | NM_001168.2    | -0.393 | 0.376 | 0.587 | Cell Cycle                                                                                                       |
| <i>CDH11</i>  | NM_001797.2    | -1.44  | 0.377 | 0.587 | EMTMetastasis                                                                                                    |

|                |                |         |       |       |                                                                                                           |
|----------------|----------------|---------|-------|-------|-----------------------------------------------------------------------------------------------------------|
| <i>WNT7B</i>   | NM_058238.1    | 0.836   | 0.394 | 0.609 | Calcium Binding and Signaling, Canonical Wnt Pathway, KEGG WNT Annotation                                 |
| <i>NRCAM</i>   | NM_005010.4    | -0.83   | 0.405 | 0.62  | Adhesion, Development & Differentiation, Migration                                                        |
| <i>NKD1</i>    | NM_033119.3    | -0.322  | 0.419 | 0.635 | Canonical Wnt Pathway, KEGG WNT Annotation, Planar Cell Polarity (PCP), WNT Signaling Negative Regulation |
| <i>FBXW4</i>   | NM_022039.3    | -0.154  | 0.449 | 0.667 | WNT Signaling Negative Regulation                                                                         |
| <i>CSNK2A1</i> | NM_177559.2    | 0.0641  | 0.453 | 0.667 | Canonical Wnt Pathway, KEGG WNT Annotation                                                                |
| <i>FZD5</i>    | NM_003468.2    | 0.582   | 0.47  | 0.683 | Canonical Wnt Pathway, KEGG WNT Annotation                                                                |
| <i>LRP5</i>    | NM_002335.1    | 0.302   | 0.472 | 0.683 | Canonical Wnt Pathway, KEGG WNT Annotation                                                                |
| <i>FOSL1</i>   | NM_005438.2    | -0.404  | 0.501 | 0.712 | Cell Cycle, KEGG WNT Annotation, Transcription Factors, WNT Signaling Target Genes                        |
| <i>SNAI1</i>   | NM_005985.2    | 0.24    | 0.569 | 0.797 | EMTMetastasis                                                                                             |
| <i>MYLK</i>    | NM_053032.2    | -0.175  | 0.572 | 0.797 | EMTMetastasis                                                                                             |
| <i>CAMK2B</i>  | NM_001220.3    | 0.369   | 0.588 | 0.81  | KEGG WNT Annotation                                                                                       |
| <i>CTBP1</i>   | NM_001328.2    | -0.0632 | 0.591 | 0.81  | Canonical Wnt Pathway, KEGG WNT Annotation, WNT Signaling Negative Regulation                             |
| <i>NFATC1</i>  | NM_172389.1    | -0.36   | 0.601 | 0.812 | Calcium Binding and Signaling, KEGG WNT Annotation                                                        |
| <i>GPC4</i>    | NM_001448.2    | 1.71    | 0.602 | 0.812 | Canonical Wnt Pathway                                                                                     |
| <i>PRKCA</i>   | NM_002737.2    | 0.471   | 0.626 | 0.826 | KEGG WNT Annotation                                                                                       |
| <i>PLCB1</i>   | NM_182734.1    | -0.534  | 0.629 | 0.826 | KEGG WNT Annotation                                                                                       |
| <i>DIXDC1</i>  | NM_001037954.3 | -0.176  | 0.639 | 0.833 | Canonical Wnt Pathway                                                                                     |
| <i>EFNB1</i>   | NM_004429.4    | 0.197   | 0.654 | 0.845 | Development & Differentiation, Migration                                                                  |
| <i>PPP3R1</i>  | NM_000945.3    | 0.0488  | 0.667 | 0.848 | KEGG WNT Annotation                                                                                       |
| <i>BCL9</i>    | NM_004326.2    | -0.132  | 0.681 | 0.857 | Canonical Wnt Pathway                                                                                     |



|               |                |         |       |       |                                                                                               |
|---------------|----------------|---------|-------|-------|-----------------------------------------------------------------------------------------------|
| <i>EP300</i>  | NM_001429.2    | 0.057   | 0.688 | 0.857 | Canonical Wnt Pathway, KEGG WNT Annotation                                                    |
| <i>WNT2B</i>  | NM_024494.1    | -0.256  | 0.696 | 0.857 | Calcium Binding and Signaling, Canonical Wnt Pathway, KEGG WNT Annotation                     |
| <i>MAPK8</i>  | NM_002750.2    | 0.117   | 0.707 | 0.857 | KEGG WNT Annotation, Planar Cell Polarity (PCP)                                               |
| <i>JAG1</i>   | NM_000214.2    | 0.266   | 0.709 | 0.857 | Development & Differentiation, Migration                                                      |
| <i>ID2</i>    | NM_002166.4    | -0.276  | 0.718 | 0.857 | Cell Cycle, Development & Differentiation                                                     |
| <i>PPP3CC</i> | NM_005605.4    | 0.0829  | 0.722 | 0.857 | KEGG WNT Annotation                                                                           |
| <i>SMO</i>    | NM_005631.3    | -0.28   | 0.732 | 0.857 | Development & Differentiation, Migration                                                      |
| <i>GSK3B</i>  | NM_002093.2    | 0.0354  | 0.735 | 0.857 | Canonical Wnt Pathway, KEGG WNT Annotation                                                    |
| <i>ZEB2</i>   | NM_014795.3    | 0.207   | 0.735 | 0.857 | EMTMetastasis                                                                                 |
| <i>RHOA</i>   | NM_001664.2    | -0.0369 | 0.737 | 0.857 | KEGG WNT Annotation, Planar Cell Polarity (PCP)                                               |
| <i>CD44</i>   | NM_001001392.1 | 0.0591  | 0.739 | 0.857 | Adhesion, Migration                                                                           |
| <i>FZD7</i>   | NM_003507.1    | 0.33    | 0.753 | 0.86  | Canonical Wnt Pathway, KEGG WNT Annotation                                                    |
| <i>CDH1</i>   | NM_004360.2    | -0.306  | 0.756 | 0.86  | Adhesion, Development & Differentiation, EMTMetastasis                                        |
| <i>EGFR</i>   | NM_201282.1    | 0.838   | 0.757 | 0.86  | Adhesion, Calcium Binding and Signaling, Cell Cycle, Development & Differentiation, Migration |
| <i>TGFB1</i>  | NM_000660.3    | 0.0283  | 0.812 | 0.903 | EMTMetastasis                                                                                 |
| <i>WNT5B</i>  | NM_032642.2    | -0.0997 | 0.813 | 0.903 | Calcium Binding and Signaling, KEGG WNT Annotation                                            |
| <i>FRZB</i>   | NM_001463.2    | 0.174   | 0.818 | 0.903 | WNT Signaling Negative Regulation                                                             |
| <i>CCND2</i>  | NM_001759.2    | -0.0898 | 0.84  | 0.915 | Cell Cycle, Development & Differentiation, KEGG WNT Annotation, WNT Signaling Target Genes    |
| <i>PPAP2B</i> | NM_003713.3    | -0.259  | 0.856 | 0.926 | Migration                                                                                     |
| <i>EGR1</i>   | NM_001964.2    | -0.149  | 0.881 | 0.928 | Development & Differentiation, Transcription Factors                                          |

|                                         |             |            |       |       |                                                                                    |
|-----------------------------------------|-------------|------------|-------|-------|------------------------------------------------------------------------------------|
| <i>TCF7</i>                             | NM_003202.2 | 0.0397     | 0.883 | 0.928 | Canonical Wnt Pathway, KEGG WNT Annotation, Transcription Factors                  |
| <i>AHR</i>                              | NM_001621.3 | -0.13      | 0.885 | 0.928 | Cell Cycle, Transcription Factors                                                  |
| <i>VANGL1</i>                           | NM_138959.2 | 0.091      | 0.886 | 0.928 | KEGG WNT Annotation                                                                |
| <i>BTRC</i>                             | NM_033637.2 | -0.0186    | 0.887 | 0.928 | KEGG WNT Annotation, WNT Signaling Negative Regulation, WNT Signaling Target Genes |
| <i>LRP6</i>                             | NM_002336.1 | 0.0948     | 0.904 | 0.939 | Canonical Wnt Pathway, KEGG WNT Annotation, WNT Signaling Negative Regulation      |
| <i>PRKX</i>                             | NM_005044.1 | -0.0233    | 0.916 | 0.946 | KEGG WNT Annotation                                                                |
| <i>RAC2</i>                             | NM_002872.3 | -0.0121    | 0.928 | 0.951 | KEGG WNT Annotation                                                                |
| <i>SFRP4</i>                            | NM_003014.2 | -0.106     | 0.935 | 0.953 | Canonical Wnt Pathway, KEGG WNT Annotation, WNT Signaling Negative Regulation      |
| <i>STAT3</i>                            | NM_139276.2 | -0.0278    | 0.943 | 0.955 | EMTMetastasis                                                                      |
| <i>CXCR4</i>                            | NM_003467.2 | -0.0396    | 0.96  | 0.966 | EMTMetastasis                                                                      |
| <i>WNT3</i>                             | NM_030753.3 | 0.0117     | 0.985 | 0.985 | Calcium Binding and Signaling, Canonical Wnt Pathway, KEGG WNT Annotation          |
| <b>GENES BELOW THE BACKGROUND LEVEL</b> |             |            |       |       |                                                                                    |
| <i>CTGF</i>                             | NM_001901.2 | <20 counts |       |       |                                                                                    |
| <i>PRKACG</i>                           | NM_002732.2 | <20 counts |       |       |                                                                                    |
| <i>DPP10</i>                            | NM_020868.3 | <20 counts |       |       |                                                                                    |
| <i>WNT1</i>                             | NM_005430.2 | <20 counts |       |       |                                                                                    |
| <i>TWIST1</i>                           | NM_000474.3 | <20 counts |       |       |                                                                                    |
| <i>FGF4</i>                             | NM_002007.2 | <20 counts |       |       |                                                                                    |
| <i>MMP3</i>                             | NM_002422.3 | <20 counts |       |       |                                                                                    |

|               |                |            |  |  |  |
|---------------|----------------|------------|--|--|--|
| <i>IGF2</i>   | NM_001127598.1 | <20 counts |  |  |  |
| <i>WNT8A</i>  | NM_058244.2    | <20 counts |  |  |  |
| <i>PPP3R2</i> | NM_147180.2    | <20 counts |  |  |  |
| <i>TWIST2</i> | NM_057179.2    | <20 counts |  |  |  |
| <i>PROM1</i>  | NM_006017.1    | <20 counts |  |  |  |
| <i>PLCB4</i>  | NM_000933.3    | <20 counts |  |  |  |
| <i>WNT9A</i>  | NM_003395.1    | <20 counts |  |  |  |
| <i>DKK2</i>   | NM_014421.2    | <20 counts |  |  |  |
| <i>DKK1</i>   | NM_012242.2    | <20 counts |  |  |  |
| <i>WISP1</i>  | NM_080838.1    | <20 counts |  |  |  |
| <i>WNT8B</i>  | NM_003393.2    | <20 counts |  |  |  |
| <i>FZD10</i>  | NM_007197.2    | <20 counts |  |  |  |
| <i>FZD4</i>   | NM_012193.2    | <20 counts |  |  |  |
| <i>WNT7A</i>  | NM_004625.3    | <20 counts |  |  |  |
| <i>SOST</i>   | NM_025237.2    | <20 counts |  |  |  |
| <i>KCNQ1</i>  | NM_181798.1    | <20 counts |  |  |  |
| <i>SFRP2</i>  | NM_003013.2    | <20 counts |  |  |  |
| <i>DLK1</i>   | NM_003836.4    | <20 counts |  |  |  |
| <i>WNT16</i>  | NM_057168.1    | <20 counts |  |  |  |
| <i>FGF7</i>   | NM_004675.2    | <20 counts |  |  |  |
| <i>TLE1</i>   | NM_005077.3    | <20 counts |  |  |  |
| <i>WIF1</i>   | NM_007191.2    | <20 counts |  |  |  |

|                                  |                |              |  |  |  |
|----------------------------------|----------------|--------------|--|--|--|
| <i>COL1A2</i>                    | NM_000089.3    | <20 counts   |  |  |  |
| <i>DKK3</i>                      | NM_001018057.1 | <20 counts   |  |  |  |
| <i>WNT9B</i>                     | NM_003396.1    | <20 counts   |  |  |  |
| <i>FZD9</i>                      | NM_003508.2    | <20 counts   |  |  |  |
| <i>PYGO1</i>                     | NM_015617.1    | <20 counts   |  |  |  |
| <b>HOUSEKEEPING IN THE PANEL</b> |                |              |  |  |  |
| <i>CC2D1B</i>                    | NM_032449.2    | Housekeeping |  |  |  |
| <i>COG7</i>                      | NM_153603.3    | Housekeeping |  |  |  |
| <i>EDC3</i>                      | NM_001142443.1 | Housekeeping |  |  |  |
| <i>GPATCH3</i>                   | NM_022078.2    | Housekeeping |  |  |  |
| <i>HDAC3</i>                     | NM_003883.2    | Housekeeping |  |  |  |
| <i>MTMR14</i>                    | NM_022485.3    | Housekeeping |  |  |  |
| <i>NUBP1</i>                     | NM_001278506.1 | Housekeeping |  |  |  |
| <i>PRPF38A</i>                   | NM_032864.3    | Housekeeping |  |  |  |
| <i>SAP130</i>                    | NM_024545.3    | Housekeeping |  |  |  |
| <i>SF3A3</i>                     | NM_006802.2    | Housekeeping |  |  |  |
| <i>TLK2</i>                      | NM_006852.2    | Housekeeping |  |  |  |
| <i>ZC3H14</i>                    | NM_001160103.1 | Housekeeping |  |  |  |
